# Supplementary material
Source: PubMed Central journal article supplement (PMC3300066)
Supplement: Supp_Data.pdf [file Supp_Data.pdf]

SUPPLEMENTARY TABLE S1. SUMMARY OF MOST SIGNIFICANT ( $P < 0.0001$ ) AND MOST FREQUENT (MORE THAN 10%) LOCI/CHROMOSOMAL REGIONS THAT SHOW GAIN, LOSS, OR LOH EVENTS IN OUR GLIOMA SPECIMEN POPULATION

| Region                       | Region length (bp) | Cytoband | Event    | Frequency % | Genes | Gene symbols (most relevant)            |
|------------------------------|--------------------|----------|----------|-------------|-------|-----------------------------------------|
| chr1:115,840,349-115,876,362 | 36013              | p13.2    | CNA Gain | 10          | 1     | NGF                                     |
| chr1:149,922,848-149,988,544 | 65696              | q21.2    | LOH      | 50          | 2     | CEZANNE, OTUD7B                         |
| chr1:155,317,904-155,629,055 | 311151             | q22      | LOH      | 52          | 9     | MSTO1, POU5F1, POU5F1P4, RAG1AP1        |
| chr1:155,667,155-155,859,034 | 191879             | q22      | LOH      | 52          | 9     | DAP3, GON4L, MSTO1, MSTO2P, SYT11       |
| chr1:193,213,301-193,217,695 | 4394               | q31.2    | CNA Loss | 83          | 1     | CDC73                                   |
| chr1:196,739,898-196,749,828 | 9930               | q31.3    | CNA Gain | 55          | 2     | CFHR1, CFHR3                            |
| chr1:204,489,678-204,513,016 | 23338              | q32.1    | CNA Gain | 10          | 2     | MDM4, MDMX                              |
| chr1:52,443,723-52,721,809   | 278086             | p32.3    | LOH      | 58          | 5     | BTF3L4, KTI12, RAB3B, TXNDC12, ZFYVE9   |
| chr1:65,408,346-65,411,168   | 2822               | p31.3    | CNA Loss | 47          | 1     | JAK1                                    |
| chr2:102,600,599-102,690,086 | 89487              | q11.2    | LOH      | 10          | 2     | IL1R1, IL1R2                            |
| chr2:135,776,317-135,793,615 | 17298              | q21.3    | LOH      | 57          | 1     | YSK4                                    |
| chr2:136,069,060-136,554,290 | 485230             | q21.3    | LOH      | 70          | 7     | LCT, R3HDM1, UBXD2, UBXN4, ZRANB3       |
| chr2:191,839,231-191,875,802 | 36571              | q32.2    | LOH      | 10          | 1     | STAT1                                   |
| chr2:212,523,834-212,545,268 | 21434              | q34      | CNA Gain | 10          | 1     | ERBB4                                   |
| chr2:39,165,218-39,371,315   | 206097             | p22.1    | LOH      | 63          | 4     | ARHGEF33, LOC100271715, LOC375196, SOS1 |
| chr2:72,541,761-72,683,915   | 142154             | p13.2    | LOH      | 58          | 1     | EXOC6B                                  |
| chr2:72,709,625-73,013,622   | 303997             | p13.2    | LOH      | 58          | 1     | EXOC6B                                  |
| chr2:73,507,166-73,530,188   | 23022              | p13.1    | LOH      | 52          | 2     | AK125051, EGR4                          |
| chr2:89,133,378-89,546,704   | 413326             | p11.2    | CNA Gain | 100         | 1     | AK128525                                |
| chr2:89,595,025-90,039,208   | 444183             | p11.2    | LOH      | 55          | 4     | IGKV, IGVK-A2, O1/O11 and JK2, X63945   |
| chr2:97,830,490-97,830,617   | 127                | q11.2    | CNA Gain | 55          | 3     | ANKRD36, ANKRD36B, UNQ2430              |
| chr2:97,877,087-97,892,459   | 15372              | q11.2    | CNA Gain | 60          | 1     | ANKRD36                                 |
| chr3:128,881,127-128,957,157 | 76030              | q21.3    | LOH      | 62          | 1     | CNBP                                    |
| chr3:129,071,880-129,239,936 | 168056             | q21.3    | LOH      | 63          | 9     | IFT122, MBD4, RPL32P3, SNORA7B, WDR10   |
| chr3:129,277,407-129,297,056 | 19649              | q22.1    | LOH      | 58          | 1     | PLXND1                                  |
| chr3:162,547,269-162,579,189 | 31920              | q26.1    | CNA Gain | 63          | 1     | BC073807                                |
| chr3:178,887,940-178,890,195 | 2255               | q26.32   | CNA Loss | 45          | 1     | PIK3CA                                  |
| chr3:41,279,127-41,279,409   | 282                | p22.1    | CNA Gain | 33          | 1     | CTNNB1                                  |
| chr3:50,652,110-50,849,185   | 197075             | p21.2    | LOH      | 73          | 2     | DOCK3, MAPKAPK3                         |
| chr3:51,672,135-51,751,052   | 78917              | p21.2    | LOH      | 57          | 4     | GRM2, KIAA0809, RAD54L2, TEX264         |

(continued)

SUPPLEMENTARY TABLE S1. (CONTINUED)

| <i>Region</i>                | <i>Region length<br/>(bp)</i> | <i>Cytoband</i> | <i>Event</i>     | <i>Frequency<br/>%</i> | <i>Genes</i> | <i>Gene symbols (most relevant)</i>       |
|------------------------------|-------------------------------|-----------------|------------------|------------------------|--------------|-------------------------------------------|
| chr3:51,813,991-51,874,005   | 60014                         | p21.2           | LOH              | 58                     | 3            | IQCF1, IQCF3, IQCF4                       |
| chr3:96,923,610-97,002,877   | 79267                         | q11.2           | LOH              | 73                     | 1            | EPHA6                                     |
| chr4:123,772,260-123,787,008 | 14748                         | q27             | LOH              | 35                     | 1            | FGF2                                      |
| chr4:151,527,605-151,711,993 | 184388                        | q31.3           | LOH              | 58                     | 1            | LRBA                                      |
| chr4:33,671,209-33,927,782   | 256573                        | p15.1           | LOH              | 70                     | 2            | AK093205, BC036345                        |
| chr4:54,953,877-55,013,933   | 60056                         | q12             | CNA Gain         | 15                     | 2            | GSX2, PDGFRA                              |
| chr4:55,104,887-55,111,661   | 6774                          | q12             | CNA Gain         | 23                     | 1            | PDGFRA                                    |
| chr4:55,547,604-55,550,739   | 3135                          | q12             | CNA Gain         | 43                     | 1            | KIT                                       |
| chr4:8,723,398-9,224,570     | 501172                        | p16.1           | LOH              | 53                     | 2            | HMX1, LOC650293                           |
| chr4:81,208,868-81,211,146   | 2278                          | q21.21          | LOH              | 45                     | 1            | FGF5                                      |
| chr4:81,254,228-81,396,086   | 141858                        | q21.21          | LOH              | 63                     | 1            | C4orf22                                   |
| chr5:1,288,678-1,299,683     | 11005                         | p15.33          | CNA Gain         | 10                     | 2            | TERT, hTERT                               |
| chr5:109,760,655-109,965,808 | 205153                        | q22.1           | LOH              | 67                     | 1            | TMEM232                                   |
| chr5:130,694,713-131,312,095 | 617382                        | q31.1           | LOH              | 55                     | 5            | ACSL6, CDC42SE2, FNIP1, KIAA0837, RAPGEF6 |
| chr5:131,322,267-131,325,504 | 3237                          | q31.1           | LOH              | 50                     | 2            | ACSL6, KIAA0837                           |
| chr5:45,355,167-45,400,441   | 45274                         | p12             | LOH              | 50                     | 1            | HCN1                                      |
| chr5:82,264,465-82,674,039   | 409574                        | q14.2           | LOH              | 12                     | 3            | SCARNA18, TMEM167A, XRCC4                 |
| chr6:128,395,712-128,603,328 | 207616                        | q22.33          | CNA Loss/<br>LOH | 47                     | 1            | PTPRK                                     |
| chr6:137,773,942-137,915,296 | 141354                        | q23.3           | CNA Loss         | 10                     | 1            | OLIG3                                     |
| chr6:64,857,929-64,963,774   | 105845                        | q12             | LOH              | 53                     | 1            | EYS                                       |
| chr7:116,278,598-116,346,115 | 67517                         | q31.2           | CNA Gain         | 40                     | 1            | MET                                       |
| chr7:120,001,452-120,112,158 | 110706                        | q31.31          | LOH              | 50                     | 1            | KCND2                                     |
| chr7:131,738,693-131,812,436 | 73743                         | q32.3           | CNA Gain         | 53                     | 1            | PLXNA4                                    |
| chr7:140,488,112-140,501,245 | 13133                         | q34             | CNA Gain         | 37                     | 1            | BRAF                                      |
| chr7:141,088,912-141,093,395 | 4483                          | q34             | CNA Gain         | 52                     | 1            | LOC100131199                              |
| chr7:143,437,619-143,499,302 | 61683                         | q35             | CNA Gain         | 50                     | 4            | CTAGE6, CTAGE6P, FAM115C, LOC154761       |
| chr7:143,502,088-143,523,707 | 21619                         | q35             | CNA Gain         | 50                     | 2            | FAM115C, LOC154761                        |
| chr7:155,283,922-155,307,419 | 23497                         | q36.3           | CNA Gain         | 50                     | 1            | CNPY1                                     |
| chr7:155,534,017-155,556,313 | 22296                         | q36.3           | CNA Gain         | 53                     | 1            | RBM33                                     |
| chr7:157,655,357-157,710,847 | 55490                         | q36.3           | CNA Gain         | 50                     | 2            | BC034557, PTPRN2                          |
| chr7:18,228,131-18,252,377   | 24246                         | p21.1           | LOH              | 15                     | 1            | HDAC9                                     |

(continued)

SUPPLEMENTARY TABLE S1. (CONTINUED)

| <i>Region</i>                | <i>Region length<br/>(bp)</i> | <i>Cytoband</i> | <i>Event</i> | <i>Frequency<br/>%</i> | <i>Genes</i> | <i>Gene symbols (most relevant)</i>         |
|------------------------------|-------------------------------|-----------------|--------------|------------------------|--------------|---------------------------------------------|
| chr7:55,164,378-55,177,039   | 12661                         | p11.2           | CNA Gain     | 55                     | 1            | EGFR                                        |
| chr7:69,294,773-69,298,934   | 4161                          | q11.22          | LOH          | 60                     | 1            | AUTS2                                       |
| chr7:80,231,843-80,287,180   | 55337                         | q21.11          | CNA Gain     | 38                     | 1            | CD36                                        |
| chr7:99,348,344-99,449,452   | 101108                        | q22.1           | LOH          | 62                     | 2            | CYP3A4, CYP3A43                             |
| chr8:100,594,007-100,650,009 | 56002                         | q22.2           | LOH          | 67                     | 1            | VPS13B                                      |
| chr8:127,653,938-129,117,940 | 1464002                       | q24.21          | CNA Gain     | 12                     | 15           | MYC, POU5F1B, POU5F1P1, PVT1, TMEM75        |
| chr8:3,564,838-3,564,979     | 141                           | p23.2           | CNA Gain     | 50                     | 1            | CSMD1                                       |
| chr8:35,534,363-35,632,919   | 98556                         | p12             | LOH          | 55                     | 1            | UNC5D                                       |
| chr8:39,233,131-39,386,080   | 152949                        | p11.22          | CNA Loss     | 62                     | 3            | ADAM3A, ADAM5P, tMDC                        |
| chr8:42,162,499-42,300,732   | 138233                        | p11.21          | LOH          | 25                     | 6            | DKK4, IKBKB, IKK-beta, POLB, SLC20A2, VDAC3 |
| chr8:43,028,010-43,253,538   | 225528                        | p11.21          | LOH          | 52                     | 2            | HGSNAT, POTEA                               |
| chr8:67,593,564-67,961,024   | 367460                        | q13.1           | LOH          | 55                     | 11           | COPS5, LRRC67, PTTG3, SGK3, SNHG6, TCF24    |
| chr8:99,945,650-100,021,792  | 76142                         | q22.2           | LOH          | 67                     | 2            | OSR2, STK3                                  |
| chr9:10,080,757-10,082,949   | 2192                          | p23             | CNA Loss     | 28                     | 1            | PTPRD                                       |
| chr9:101,907,066-101,915,474 | 8408                          | q22.33          | CNA Gain     | 13                     | 1            | TGFBF1                                      |
| chr9:133,696,872-133,706,252 | 9380                          | q34.12          | CNA Gain     | 12                     | 1            | ABL1                                        |
| chr9:135,807,481-135,811,210 | 3729                          | q34.13          | CNA Gain     | 87                     | 1            | TSC1                                        |
| chr9:21,966,077-22,045,357   | 79280                         | p21.3           | CNA Loss     | 42                     | 6            | CDKN2A, CDKN2B, CDKN2B-AS1, CDKN2BAS        |
| chr9:5,106,345-5,107,687     | 1342                          | p24.1           | CNA Loss     | 32                     | 1            | JAK2                                        |
| chr9:77,124,093-77,189,552   | 65459                         | q21.13          | CNA Gain     | 17                     | 1            | RORB                                        |
| chr9:9,905,304-9,937,813     | 32509                         | p23             | CNA Loss     | 28                     | 1            | PTPRD                                       |
| chr9:98,227,882-98,235,731   | 7849                          | q22.32          | CNA Gain     | 17                     | 1            | PTCH1                                       |
| chr10:22,285,508-22,290,708  | 5200                          | p12.31          | LOH          | 57                     | 1            | DNAJC1                                      |
| chr10:22,604,059-22,743,403  | 139344                        | p12.2           | LOH          | 62                     | 6            | BMI1, COMMD3, COMMD3-BMI1, SPAG6            |
| chr10:47,058,830-47,058,947  | 117                           | q11.22          | CNA Loss     | 77                     | 1            | ANXA8                                       |
| chr10:70,252,806-70,278,403  | 25597                         | q21.3           | CNA Loss     | 55                     | 1            | SLC25A16                                    |
| chr10:70,364,109-70,379,237  | 15128                         | q21.3           | CNA Loss     | 55                     | 1            | TET1                                        |
| chr10:70,538,635-70,568,271  | 29636                         | q21.3           | CNA Loss     | 53                     | 1            | CCAR1                                       |
| chr10:74,179,130-74,647,848  | 468718                        | q22.1           | LOH          | 68                     | 4            | CBARA1, CCDC109A                            |
| chr10:74,679,123-74,707,846  | 28723                         | q22.1           | LOH          | 63                     | 4            | FKSG71, LZP, OIT3, PLA2G12B                 |
| chr10:74,806,110-74,832,518  | 26408                         | q22.1           | LOH          | 80                     | 1            | P4HA1                                       |
| chr10:74,836,345-74,977,469  | 141124                        | q22.1           | LOH          | 80                     | 8            | ECD, FAM149B1, HSGT1, NUDT13, P4HA1         |

(continued)

SUPPLEMENTARY TABLE S1. (CONTINUED)

| <i>Region</i>                 | <i>Region length<br/>(bp)</i> | <i>Cytoband</i> | <i>Event</i> | <i>Frequency<br/>%</i> | <i>Genes</i> | <i>Gene symbols (most relevant)</i>     |
|-------------------------------|-------------------------------|-----------------|--------------|------------------------|--------------|-----------------------------------------|
| chr10:75,393,095-75,403,007   | 9912                          | q22.2           | LOH          | 60                     | 1            | MYOZ1                                   |
| chr10:76,216,794-76,312,960   | 96166                         | q22.2           | LOH          | 53                     | 1            | ADK                                     |
| chr10:89,643,156-89,657,506   | 14350                         | q23.31          | CNA Loss     | 23                     | 1            | PTEN                                    |
| chr11:66,834,065-67,156,086   | 322021                        | q13.2           | LOH          | 55                     | 12           | ADRBK1, ANKRD13D, POLD4, RHOD, SSH3     |
| chr11:85,074,287-85,298,573   | 224286                        | q14.1           | LOH          | 50                     | 1            | DLG2                                    |
| chr12:112,008,084-112,122,577 | 114493                        | q24.12          | LOH          | 73                     | 2            | ATXN2, BRAP                             |
| chr12:25,370,571-25,378,581   | 8010                          | p12.1           | CNA Gain     | 12                     | 1            | KRAS                                    |
| chr12:44,552,264-44,730,534   | 178270                        | q12             | LOH          | 53                     | 2            | DKFZp434K2435, TMEM117                  |
| chr12:69,215,181-69,223,109   | 7928                          | q15             | CNA Gain     | 12                     | 1            | MDM2                                    |
| chr12:79,754,574-79,767,935   | 13361                         | q21.2           | LOH          | 50                     | 1            | SYT1                                    |
| chr12:80,063,279-80,084,228   | 20949                         | q21.2           | LOH          | 65                     | 1            | PAWR                                    |
| chr12:88,818,490-88,943,151   | 124661                        | q21.32          | LOH          | 63                     | 1            | KITLG                                   |
| chr13:20,146,459-20,215,321   | 68862                         | q12.11          | LOH          | 52                     | 1            | MPHOSPH8                                |
| chr13:32,895,437-32,895,818   | 381                           | q13.1           | CNA Loss     | 17                     | 1            | BRCA2                                   |
| chr13:48,968,806-48,977,636   | 8830                          | q14.2           | CNA Loss     | 25                     | 2            | P2RY5, RB1                              |
| chr14:106,224,107-106,317,560 | 93453                         | q32.33          | CNA Gain     | 98                     | 8            | FLJ00382, FLJ00385, IGHD, IGHE, SNC73   |
| chr14:45,348,246-45,726,930   | 378684                        | q21.2           | LOH          | 52                     | 13           | FAM179B, FANCM, FKBP3, KLHL28, PRPF39   |
| chr14:67,224,058-67,485,693   | 261635                        | q23.3           | LOH          | 80                     | 1            | GPHN                                    |
| chr15:28,532,377-28,915,625   | 383248                        | q13.1           | LOH          | 73                     | 18           | GOLGA8F, GOLGA8G, HERC2, HERC2P9        |
| chr15:28,962,607-29,013,140   | 50533                         | q13.1           | LOH          | 58                     | 1            | WHAMML2                                 |
| chr15:42,907,543-42,920,911   | 13368                         | q15.2           | LOH          | 58                     | 2            | DKFZp686O248, STARD9                    |
| chr15:42,983,043-43,013,759   | 30716                         | q15.2           | LOH          | 60                     | 2            | KIAA1300, STARD9                        |
| chr15:44,228,978-44,372,804   | 143826                        | q15.3           | LOH          | 50                     | 1            | FRMD5                                   |
| chr15:48,386,383-48,501,733   | 115350                        | q21.1           | LOH          | 52                     | 7            | CTXN2, JSX, MYEF2, SLC12A1, SLC24A5     |
| chr15:72,150,286-72,483,254   | 332968                        | q23             | LOH          | 55                     | 3            | GRAMD2, MYO9A, SENP8                    |
| chr15:72,599,338-72,693,720   | 94382                         | q23             | LOH          | 55                     | 6            | BC034424, BRUNOL6, CELF6, HEXA, TMEM202 |
| chr15:76,891,782-76,892,117   | 335                           | q24.3           | CNA Loss     | 58                     | 1            | SCAPER                                  |
| chr16:32,180,795-32,291,662   | 110867                        | p11.2           | LOH          | 58                     | 3            | AK300387, BC042588, TP53TG3b            |
| chr16:32,305,355-32,501,659   | 196304                        | p11.2           | LOH          | 58                     | 2            | BC041879, DQ578965                      |
| chr16:32,699,406-32,793,376   | 93970                         | p11.2           | LOH          | 55                     | 2            | DQ574674, X69637                        |
| chr16:46,973,595-47,001,592   | 27997                         | q11.2           | LOH          | 57                     | 1            | DNAJA2                                  |

(continued)

SUPPLEMENTARY TABLE S1. (CONTINUED)

| <i>Region</i>               | <i>Region length<br/>(bp)</i> | <i>Cytoband</i> | <i>Event</i> | <i>Frequency<br/>%</i> | <i>Genes</i> | <i>Gene symbols (most relevant)</i>     |
|-----------------------------|-------------------------------|-----------------|--------------|------------------------|--------------|-----------------------------------------|
| chr16:67,006,431-67,079,578 | 73147                         | q22.1           | LOH          | 72                     | 6            | CBFB, CES3, CES4A, CES8, UNQ440, UNQ869 |
| chr16:67,521,501-67,579,786 | 58285                         | q22.1           | LOH          | 73                     | 1            | FAM65A                                  |
| chr16:67,923,177-68,036,074 | 112897                        | q22.1           | LOH          | 58                     | 9            | DPEP2, KCC1, PSKH1, PSMB10, SLC12A4     |
| chr17:18,365,394-18,384,217 | 18823                         | p11.2           | CNA Loss     | 53                     | 1            | LGALS9C                                 |
| chr17:37,851,743-37,855,170 | 3427                          | q12             | LOH          | 35                     | 2            | ERBB2, c-ERBB-2                         |
| chr17:40,356,548-40,393,215 | 36667                         | q21.2           | LOH          | 38                     | 1            | STAT5B                                  |
| chr17:40,481,586-40,494,460 | 12874                         | q21.2           | LOH          | 33                     | 1            | STAT3                                   |
| chr17:41,168,047-41,231,960 | 63913                         | q21.31          | LOH          | 22                     | 3            | BRCA1, RND2, VAT1                       |
| chr17:44,364,192-44,379,313 | 15121                         | q21.31          | CNA Gain     | 58                     | 5            | ARL17A, ARL17B, ARL17P1, LRRC37A        |
| chr17:58,044,185-58,115,499 | 71314                         | q23.1           | LOH          | 65                     | 3            | AK097658, DHX40P, DHX40P1               |
| chr17:58,213,981-58,282,621 | 68640                         | q23.1           | LOH          | 77                     | 2            | CA4, USP32                              |
| chr17:58,479,880-58,521,096 | 41216                         | q23.2           | LOH          | 82                     | 3            | APPBP2, AX746718, C17orf64              |
| chr17:58,658,544-58,721,479 | 62935                         | q23.2           | LOH          | 78                     | 1            | PPM1D                                   |
| chr17:62,493,482-62,599,558 | 106076                        | q23.3           | LOH          | 55                     | 5            | CCDC45, CEP95, DDX5, SMURF2             |
| chr17:62,767,483-62,960,501 | 193018                        | q24.1           | LOH          | 50                     | 4            | DKFZp313K107, LRRC37A3, PLEKHM1P        |
| chr17:7,553,384-7,583,498   | 30114                         | p13.1           | CNA Loss     | 13                     | 3            | ATP1B2, TP53, p53                       |
| chr20:34,026,177-34,048,140 | 21963                         | q11.22          | LOH          | 53                     | 3            | C-NAP1, CEP250, GDF5                    |
| chr20:34,477,137-34,535,591 | 58454                         | q11.23          | LOH          | 60                     | 2            | AX746620, PHF20                         |
| chr21:34,367,689-34,414,360 | 46671                         | q22.11          | CNA Gain     | 10                     | 1            | OLIG2                                   |
| chr21:36,877,378-36,889,274 | 11896                         | q22.12          | CNA Gain     | 10                     | 1            | RUNX1                                   |
| chr22:22,382,116-22,384,395 | 2279                          | q11.22          | CNA Loss     | 70                     | 2            | AK131325                                |
| chr22:29,980,726-30,080,694 | 99968                         | q12.2           | LOH          | 17                     | 1            | NF2                                     |
| chr22:42,299,725-42,671,487 | 371762                        | q13.2           | CNA Loss     | 12                     | 20           | CYP2D6, NAGA, SEPT3, SHISA8, SREBF2     |
